# Supplementary material for: Reduction-cleavable desferrioxamine B pulldown system enriches Ni(ii)-superoxide dismutase from a Streptomyces proteome
Source: Royal Society of Chemistry journal article supplement (doi:10.1039/d3cb00097d), 2023-01-01
Supplement: d3cb00097d1.pdf [file d3cb00097d1.pdf]

## Supporting Information

### Reduction-cleavable desferrioxamine B pulldown system enriches Ni(II)-superoxide dismutase from a *Streptomyces* proteome

#### Table of contents

| Item                                                                                                                                          | Pg  |
|-----------------------------------------------------------------------------------------------------------------------------------------------|-----|
| Table of contents.....                                                                                                                        | S1  |
| Scaled synthesis and characterisation protocols.....                                                                                          | S2  |
| Figure S1. <sup>1</sup> H NMR (600 MHz, DMSO-d <sub>6</sub> ) spectrum of <b>2</b> .....                                                      | S3  |
| Figure S2. <sup>13</sup> C{ <sup>1</sup> H} NMR (150 MHz, DMSO-d <sub>6</sub> ) spectrum of <b>2</b> .....                                    | S3  |
| Figure S3. <sup>1</sup> H- <sup>1</sup> H COSY NMR (600 MHz, DMSO-d <sub>6</sub> ) spectrum of <b>2</b> .....                                 | S4  |
| Figure S4. <sup>1</sup> H- <sup>13</sup> C NMR HSQC (600 MHz, DMSO-d <sub>6</sub> ) spectrum of <b>2</b> .....                                | S4  |
| Figure S5. <sup>1</sup> H- <sup>13</sup> C NMR HMBC (600 MHz, DMSO-d <sub>6</sub> ) spectrum of <b>2</b> .....                                | S5  |
| Figure S6. HRMS (ESI) <sup>+</sup> spectrum of <b>2</b> .....                                                                                 | S5  |
| Figure S7. <sup>1</sup> H NMR (600 MHz, DMSO-d <sub>6</sub> ) spectrum of <b>3a</b> and <b>3</b> .....                                        | S6  |
| Figure S8. <sup>13</sup> C{ <sup>1</sup> H} NMR (150 MHz, DMSO-d <sub>6</sub> ) spectrum of <b>3a</b> and <b>3</b> .....                      | S6  |
| Figure S9. <sup>1</sup> H- <sup>1</sup> H COSY NMR (600 MHz, DMSO-d <sub>6</sub> ) spectrum of <b>3a</b> and <b>3</b> .....                   | S7  |
| Figure S10. <sup>1</sup> H- <sup>13</sup> C NMR HSQC (600 MHz, DMSO-d <sub>6</sub> ) spectrum of <b>3a</b> and <b>3</b> .....                 | S7  |
| Figure S11. <sup>1</sup> H- <sup>13</sup> C NMR HMBC (600 MHz, DMSO-d <sub>6</sub> ) spectrum of <b>3a</b> and <b>3</b> .....                 | S8  |
| Figure S12. LC traces and experimental and calculated MS isotope patterns from <b>2a</b> and <b>2</b> .....                                   | S9  |
| Figure S13. LC traces and experimental and calculated MS isotope patterns from <b>3a</b> and <b>3</b> .....                                   | S9  |
| Figure S14. Electronic spectra from solutions of Fe(III)- <b>1</b> and Fe(III)- <b>2</b> .....                                                | S9  |
| Figure S15. Experimental and calculated MS isotope patterns from a solution of Fe(III)- <b>2</b> .....                                        | S9  |
| Figure S16. Fe(III) additional assay on sub-samples of <i>S. pilosus</i> culture .....                                                        | S10 |
| Figure S17. Protein content (Bradford method) in fractions from pulldown procedure using <b>2-R</b> , Fe(III)- <b>2-R</b> or <b>3-R</b> ..... | S10 |
| Figure S18. SDS-PAGE gel from pulldown procedure.....                                                                                         | S10 |
| Figure S19. SDS-PAGE gel from pulldown procedure with marked regions analysed using densitometry .....                                        | S10 |
| Figure S20. MS/MS spectrum of peptides from NiSOD identified from the pulldown procedure.....                                                 | S11 |
| Figure S21. UV-Vis spectra from titration of <b>1</b> with recombinant NiSOD.....                                                             | S11 |
| Table S1. MS-MS peptide reads for NiSOD.....                                                                                                  | S12 |

## Scaled synthesis and characterisation protocols

**NMR spectroscopy (compound characterisation).**  $^1\text{H}$  and  $^{13}\text{C}$  spectra were acquired on a 600 MHz Bruker Avance III NMR spectrometer equipped with a TCI cryoprobe at 600 MHz and 150 MHz respectively. Spectra were recorded at 298 K using DMSO- $d_6$  as the solvent and internal lock. All spectra were referenced to the residual solvent signal (DMSO- $d_6$ :  $^1\text{H}$  2.50 ppm,  $^{13}\text{C}$  39.52 ppm) and are reported as follows: (1) chemical shift (ppm), (2) integration, (3), multiplicity (s, singlet; brs, broad singlet; d, doublet; dd, doublet of doublets t, triplet; m, multiplet); (4) coupling constant (Hz). Signals were assigned to individual compounds with the aid of 2D homonuclear ( $^1\text{H}$ - $^1\text{H}$  COSY) and heteronuclear ( $^1\text{H}$ - $^{13}\text{C}$  HSQC and HMBC) correlation spectroscopy.

**HRMS (compound characterisation).** HRMS analysis was conducted on a Thermofisher Vanquish Horizon UHPLC coupled to a Thermofisher Q-Exactive HFX Hybrid Quadrupole-Orbitrap mass spectrometer. Solvent A was 0.1% formic acid in water and solvent B was 0.1% formic acid in acetonitrile. An Agilent Zorbax Eclipse XDB-C18 column (150 mm x 2.1 mm I.D., 3.5  $\mu\text{m}$ ) maintained at 30  $^\circ\text{C}$  with a constant flow rate of 0.2 mL/min was employed. A sample injection volume of 5  $\mu\text{L}$  was used and the solvent program was as follows: a linear gradient of 5-95% solvent B over 25 min followed by 95% solvent B held for 5 min. Solvent B was then held at 5% for an additional 5 min to re-equilibrate for the following injection. The mass spectrometer was operated in positive ion-mode using electrospray ionisation (ESI) with a mass range of 100-1500 m/z. A spray voltage of 3.5 kV was used and the capillary temperature maintained at 300  $^\circ\text{C}$ .

**HPLC (compound purification).** Preparative HPLC purification was undertaken on a Shimadzu LC-20 series high performance liquid chromatography system with two LC-20AP preparative pumps, a SIL-10AP autosampler and a SPD-20A photo-diode array detector. A Shim-pack GIS-C18 column (150 x 20 ID, 5  $\mu\text{m}$ ) was used at 20 mL/min. Mobile phase A was 0.1 % formic acid in Milli-Q water and mobile phase B was 0.1 % formic acid in acetonitrile with solvent programs as stated below for individual compounds.

**Preparative scale synthesis of *N*-DFOB-3-mercaptopropanamide (DFOB-SH) (2).** Triethylamine (67  $\mu\text{L}$ , 0.48 mmol.) and DTSP (53 mg, 0.13 mmol.) were added to a solution of DFOB mesylate salt (151 mg, 23 mmol.) in anhydrous DMF (2 mL) under nitrogen. The resulting mixture was heated at 70  $^\circ\text{C}$  for 16 h under nitrogen. The solvent was removed in vacuo and the crude material reconstituted in water. The suspension was pH adjusted to 10 with 1 M sodium hydroxide solution. TCEP hydrochloride (0.5 mL, 0.5 M aqueous solution, 0.25 mmol.) was added to the aqueous mixture and left to stir at room temperature under nitrogen for 4 h. The solvent was removed in vacuo and the crude material reconstituted in 1 M sodium hydroxide solution for purification by preparative HPLC (5-60 % mobile phase B over 20 min) yielding the desired product (2) as a white powder (50 mg, 34%).

*N*-DFOB-3-mercaptopropanamide (DFOB-SH) (2).  $^1\text{H}$  NMR (600 MHz, DMSO- $d_6$ )  $\delta$  9.67 (1H, brs), 9.63 (2H, brs), 7.84 (1H, dd,  $J$  = 4.8, 5.4 Hz), 7.77 (2H, dd,  $J$  = 4.8, 5.4 Hz), 3.45 (6H, t,  $J$  = 6.7 Hz), 2.98-3.03 (6H, m), 2.64 (2H, t,  $J$  = 6.6 Hz), 2.57 (4H, t,  $J$  = 7.1 Hz), 2.35 (2H, t,  $J$  = 6.6 Hz), 2.26 (4H, t,  $J$  = 7.3 Hz), 1.96 (3H, s), 1.49 (6H, m), 1.38 (6H, m), 1.22 (6H, m).  $^{13}\text{C}$  (150 MHz, DMSO- $d_6$ )  $\delta$  171.97, 171.32, 170.14, 170.01, 47.08, 46.79, 38.43, 38.38, 29.91, 28.82, 27.58, 26.04, 23.50, 20.36, 20.01. HRMS (ESI) $^+$  calculated for  $\text{C}_{28}\text{H}_{53}\text{N}_6\text{O}_9\text{S}$  [M+H] $^+$ : 649.3589, observed: 649.3580.

**Semi-preparative scale synthesis of *N*-methyl-3-mercaptopropanamide (MA-SH) (3).** Methylamine hydrochloride (35 mg, 0.52 mmol) and DTSP (105 mg, 0.26 mmol) was dissolved in a miscible solution of 5.5% water in acetone. Triethylamine (72  $\mu\text{L}$ , 0.25 mmol) was added and the reaction stirred at room temperature for 24 h. The solution was then concentrated in vacuo and redissolved in water. 2-Mercaptoethanol (36  $\mu\text{L}$ , 0.52 mmol) was then added into the crude mixture and the reaction stirred under nitrogen overnight. The resulting solution was then HPLC purified (0% mobile phase B held for 3 min, 0-20% mobile phase B over 12 min) and the collected fractions dried in vacuo. Qualitative LC-MS analysis confirmed the isolation of the desired free thiol however, NMR analysis showed MA-SH (3) dimerised on standing to regenerate (MA) $_2$ -SS (3a). The isolated material was spectroscopically characterised as a mixture of (MA) $_2$ -SS (3a) and MA-SH (3).

3,3'-Disulfanediyldis(*N*-methylpropanamide) (MA) $_2$ -SS (3a).  $^1\text{H}$  NMR (600 MHz, DMSO- $d_6$ )  $\delta$  7.87 (2H, brs), 2.87 (4H, t,  $J$  = 7.2 Hz), 2.57 (3H, d,  $J$  = 4.6 Hz), 2.44 (4H, t,  $J$  = 7.2 Hz).  $^{13}\text{C}$  (150 MHz, DMSO- $d_6$ )  $\delta$  170.44, 34.91, 33.87, 25.46.

*N*-Methyl-3-mercaptopropanamide (MA-SH) (3).  $^1\text{H}$  NMR (600 MHz, DMSO- $d_6$ )  $\delta$  7.86 (1H, brs), 2.63 (2H, dd,  $J$  = 7.2, 14.4 Hz), 2.57 (3H, d,  $J$  = 4.6 Hz), 2.35 (2H, t,  $J$  = 7.2 Hz), 2.27 (1H, t,  $J$  = 8.0 Hz).  $^{13}\text{C}$  (150 MHz, DMSO- $d_6$ )  $\delta$  170.65, 38.28, 25.53, 19.97.

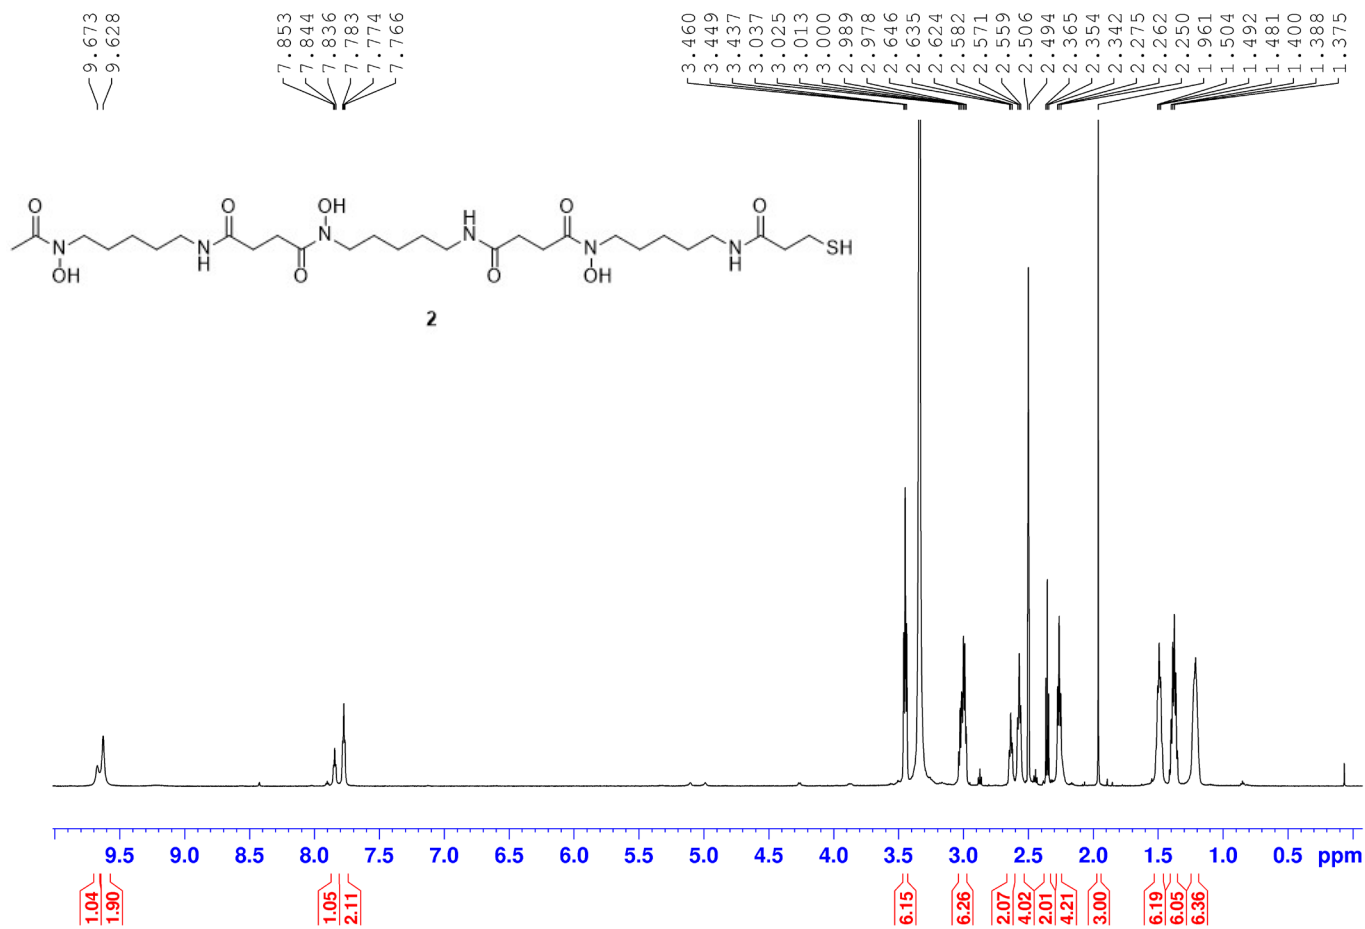

Fig. S1. <sup>1</sup>H NMR (600 MHz, DMSO-d<sub>6</sub>) spectrum of **2**

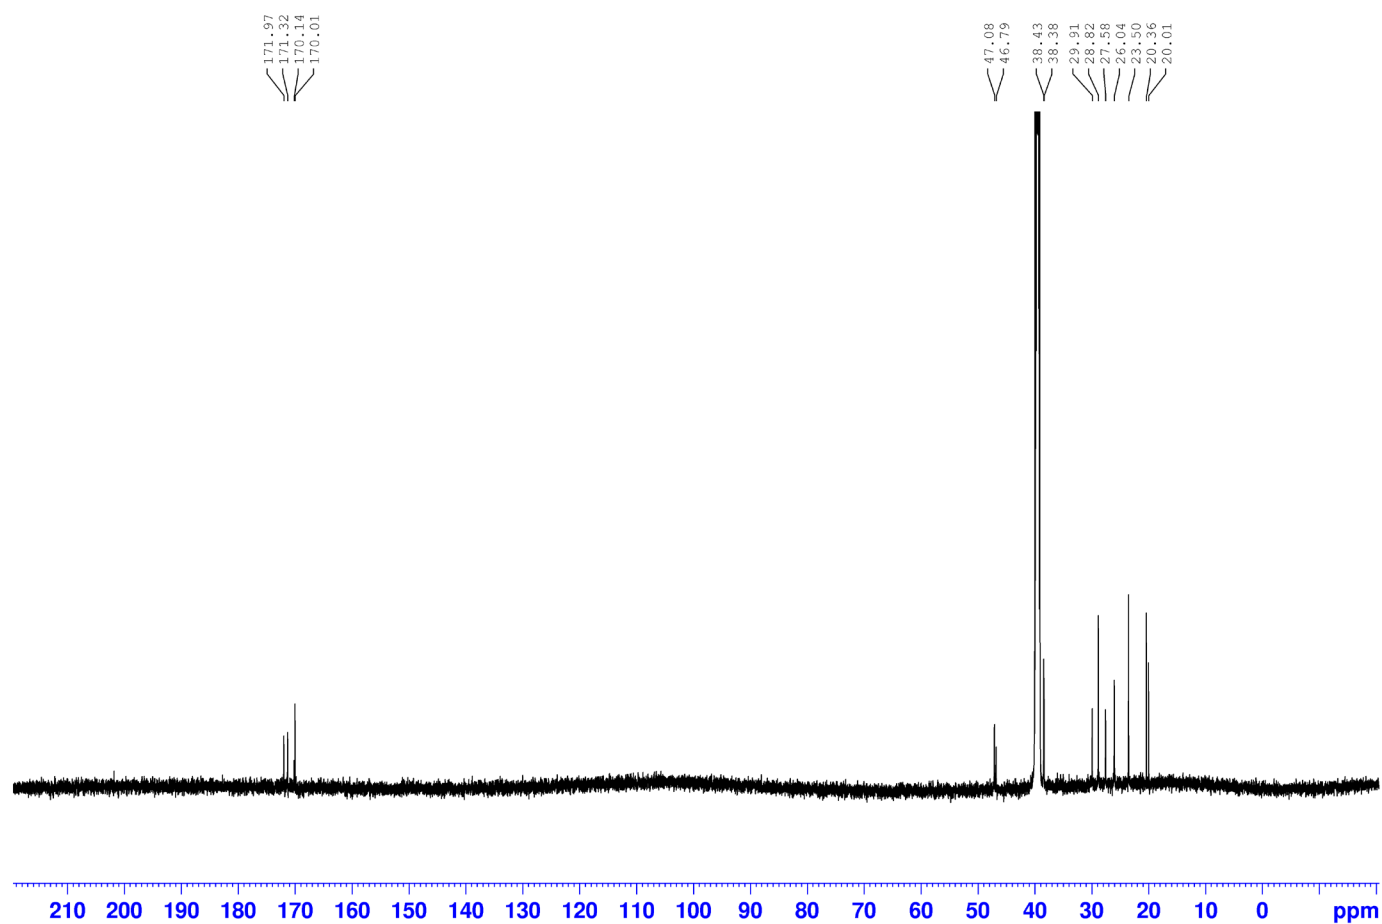

Fig. S2. <sup>13</sup>C{<sup>1</sup>H} NMR (150 MHz, DMSO-d<sub>6</sub>) spectrum of **2**

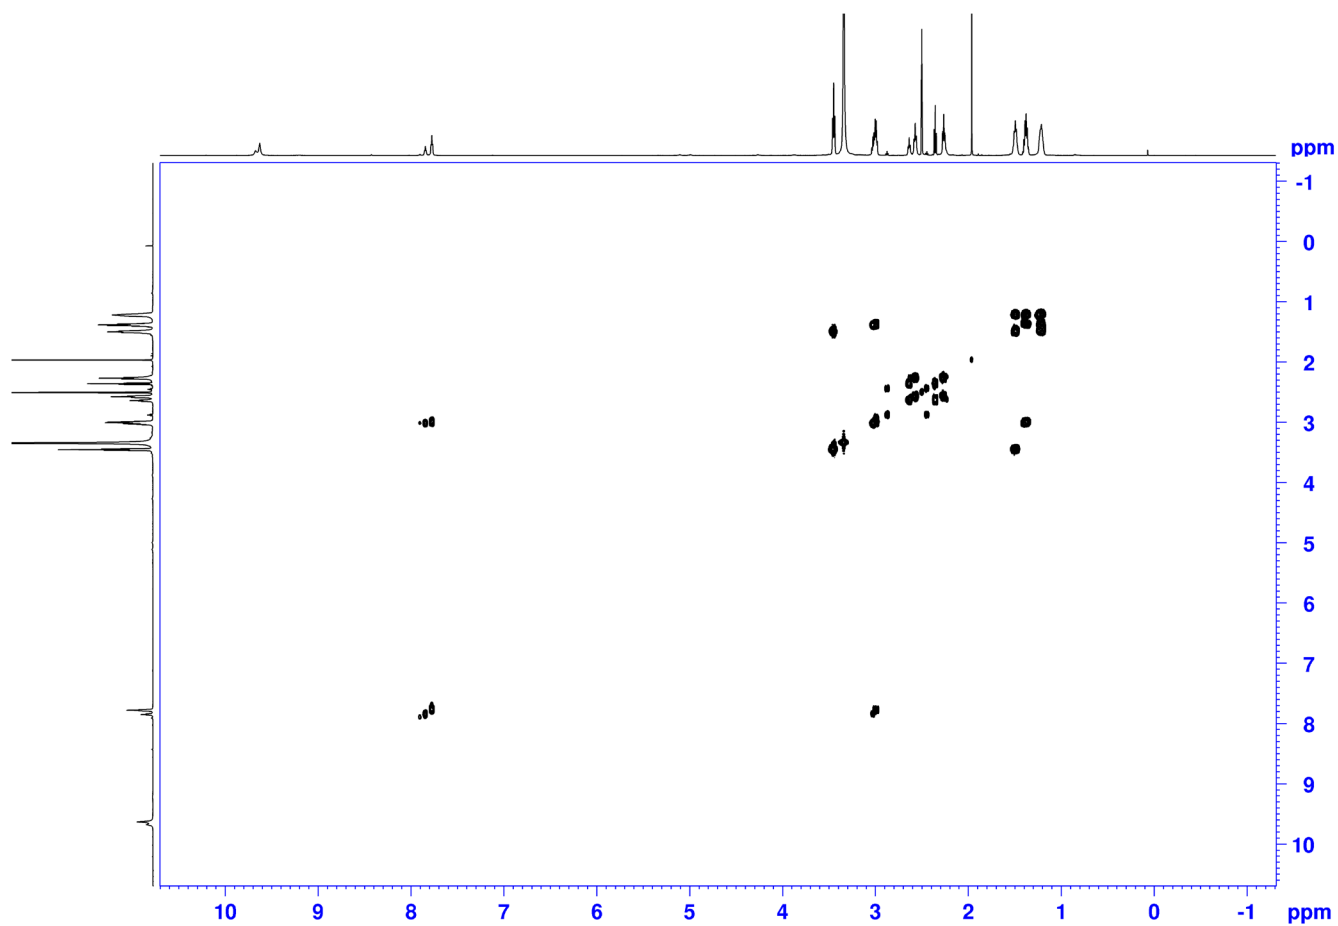

Fig. S3. <sup>1</sup>H-<sup>1</sup>H COSY NMR (600 MHz, DMSO-d<sub>6</sub>) spectrum of **2**

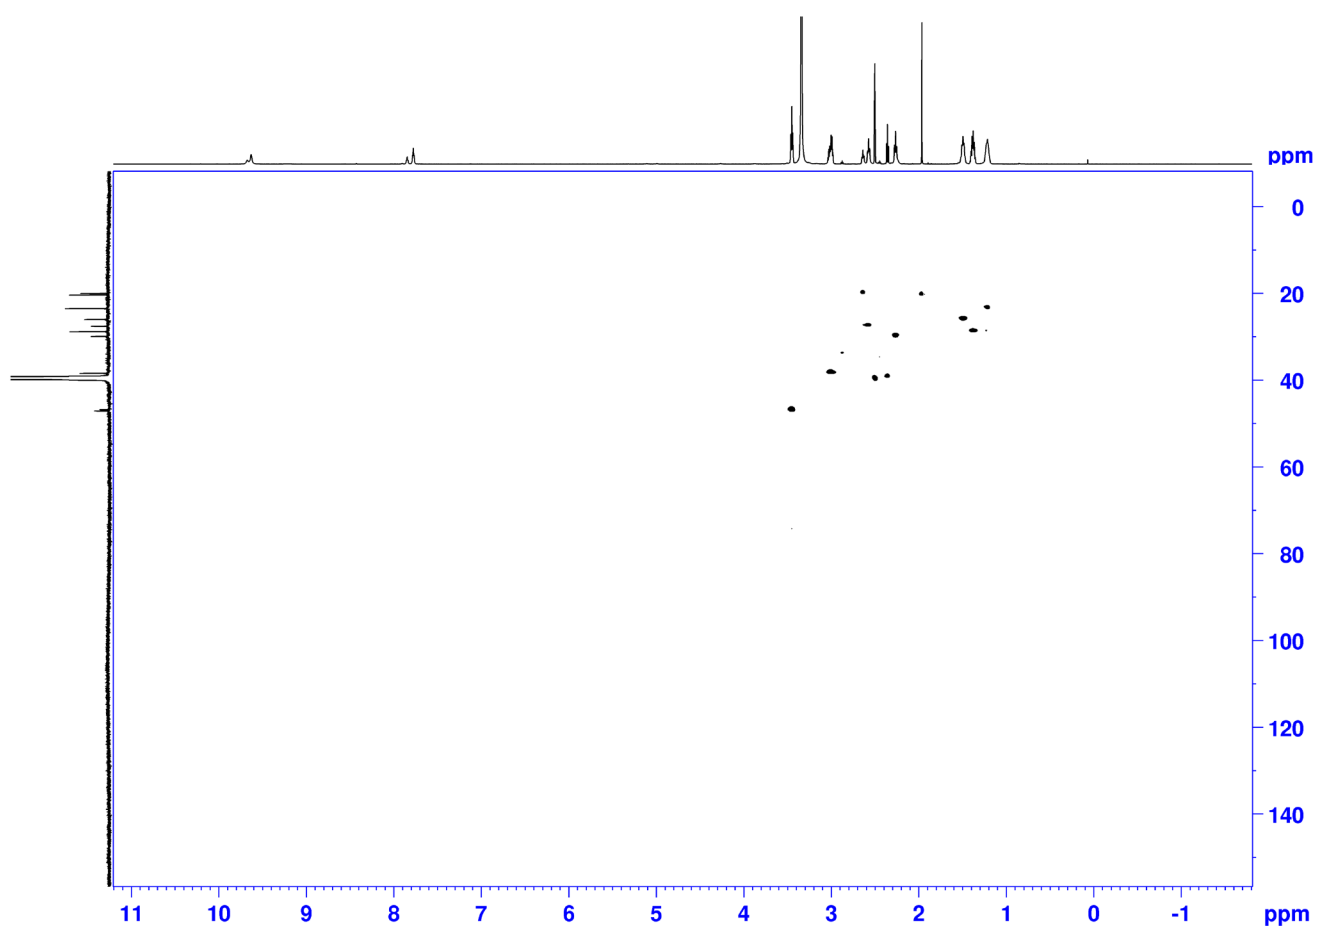

Fig. S4. <sup>1</sup>H-<sup>13</sup>C HSQC NMR (600 MHz, DMSO-d<sub>6</sub>) spectrum of **2**

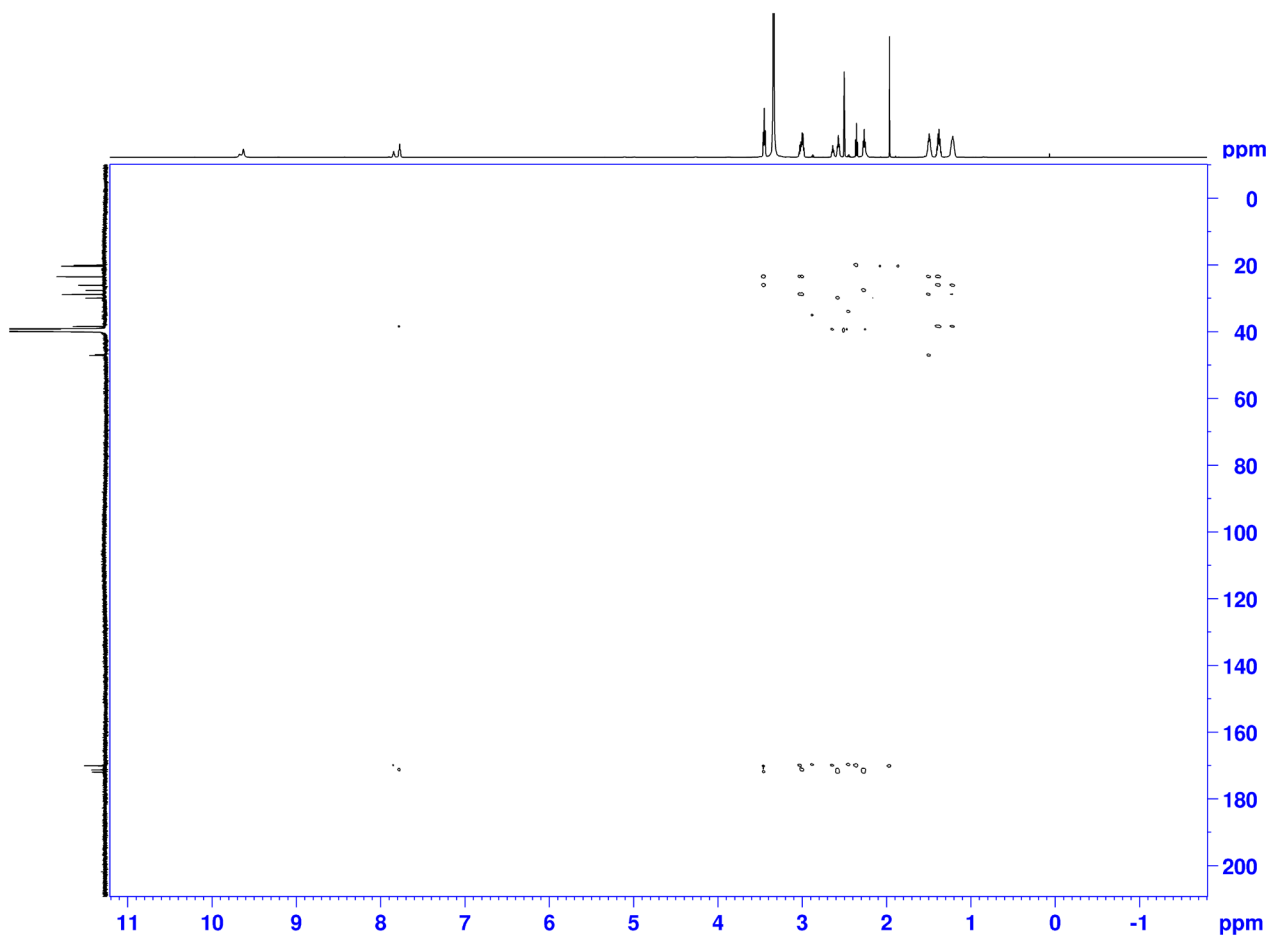

Fig. S5.  $^1\text{H}$ - $^{13}\text{C}$  HMBC NMR (600 MHz,  $\text{DMSO-d}_6$ ) spectrum of **2**

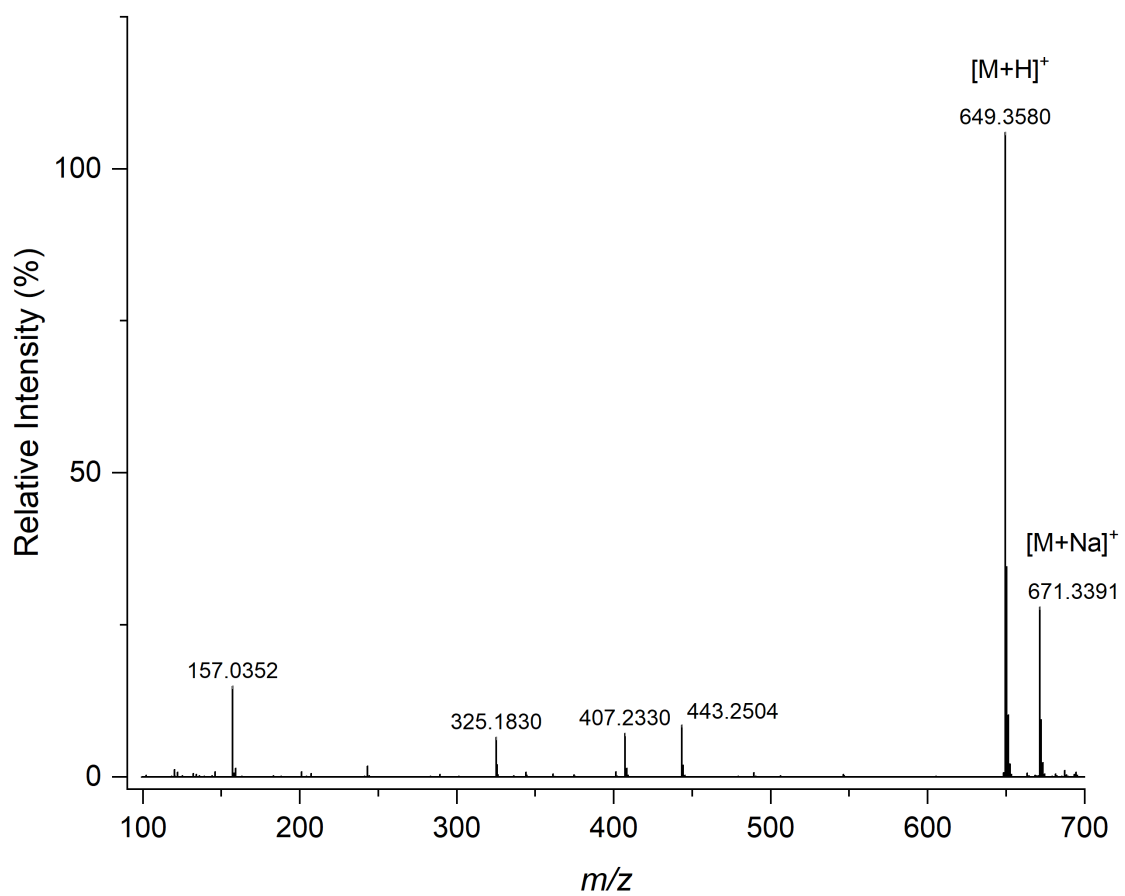

Fig. S6. HRMS (ESI) $^+$  spectrum of **2**

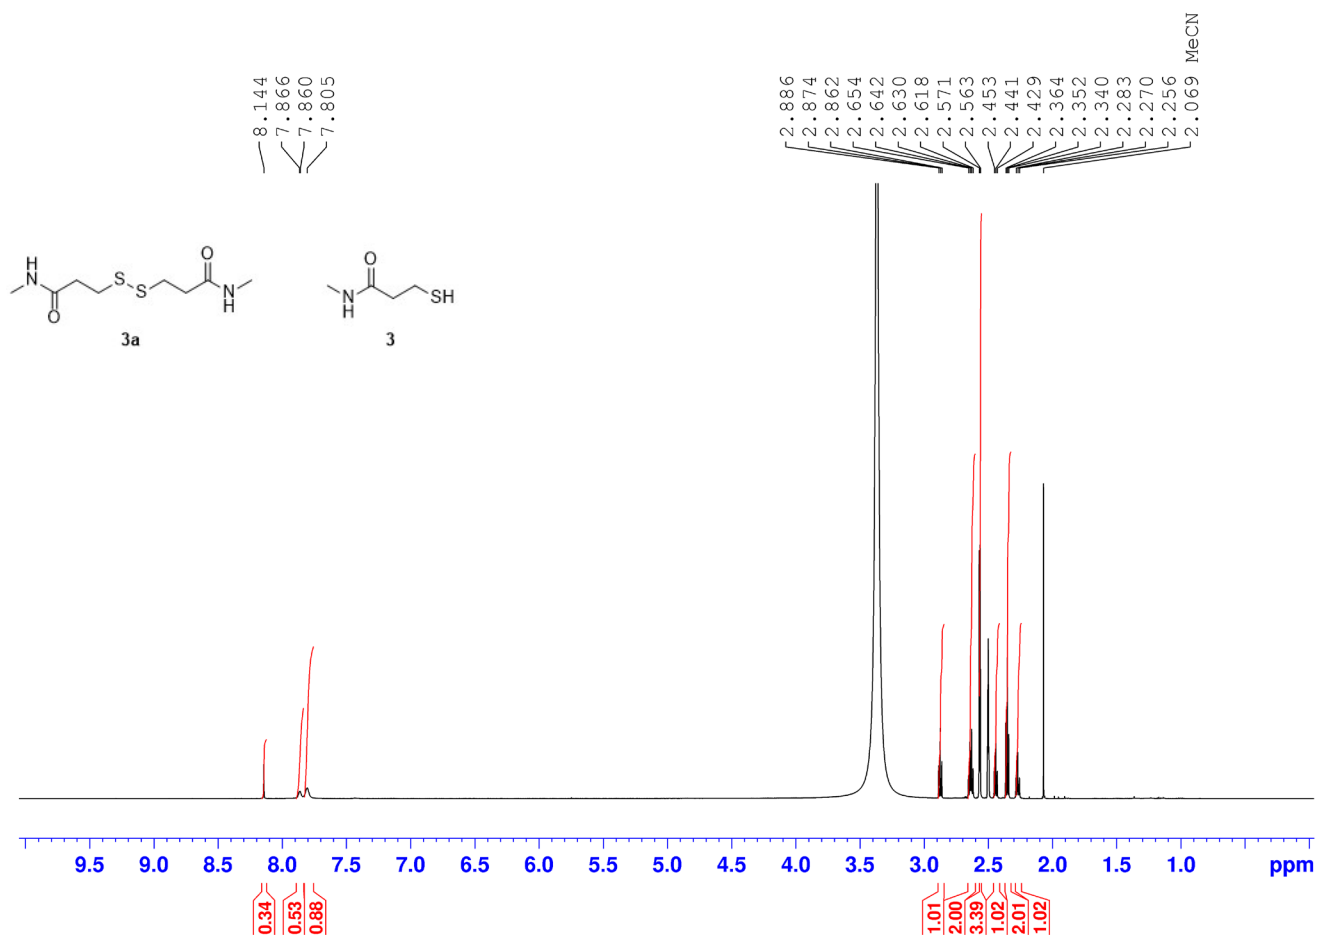

Fig. S7. <sup>1</sup>H NMR (600 MHz, DMSO-d<sub>6</sub>) spectrum of **3a** and **3**

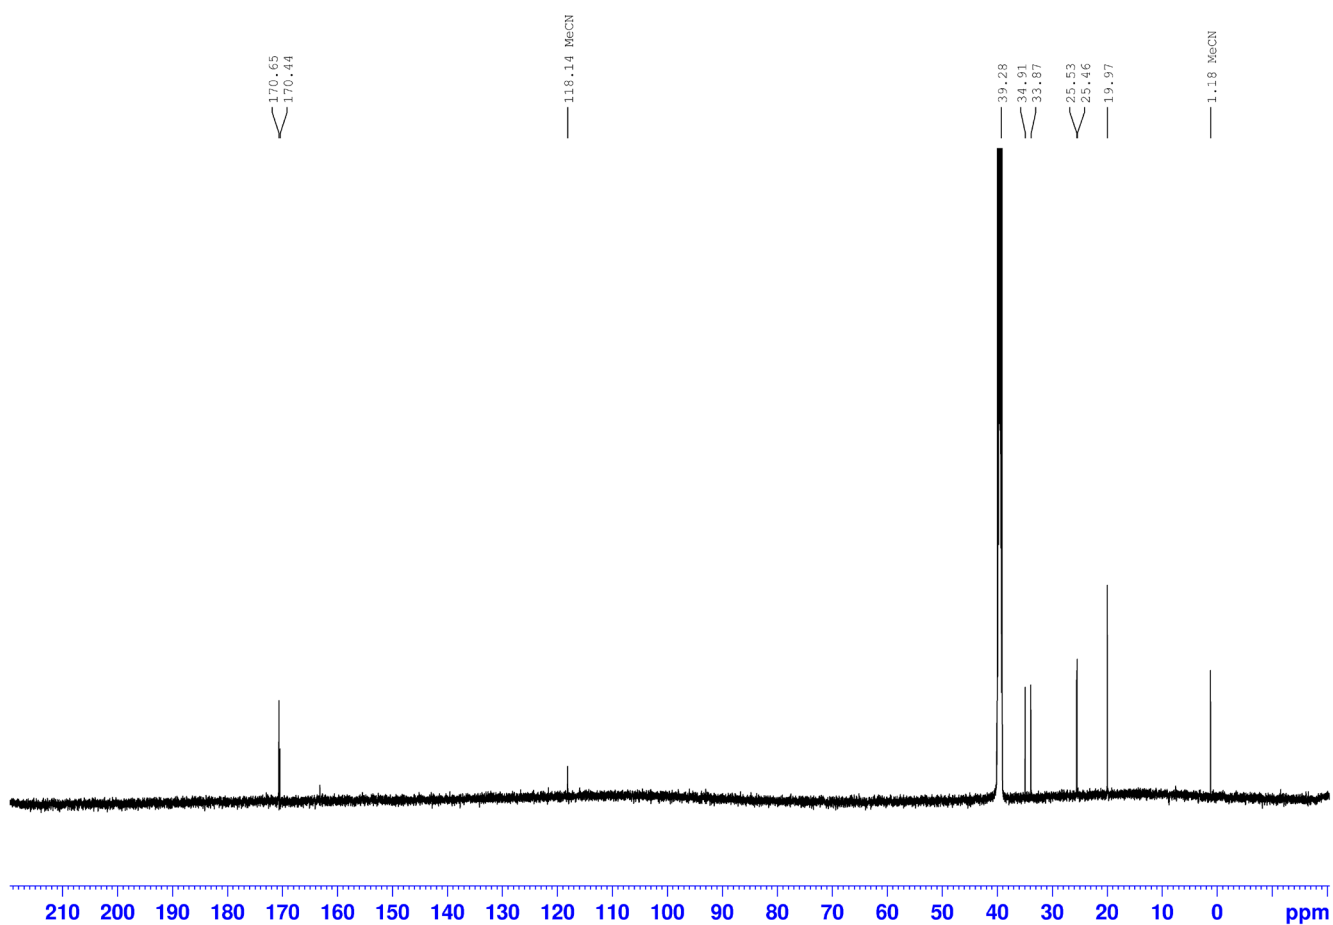

Fig. S8. <sup>13</sup>C{<sup>1</sup>H} NMR (150 MHz, DMSO-d<sub>6</sub>) spectrum of **3a** and **3**

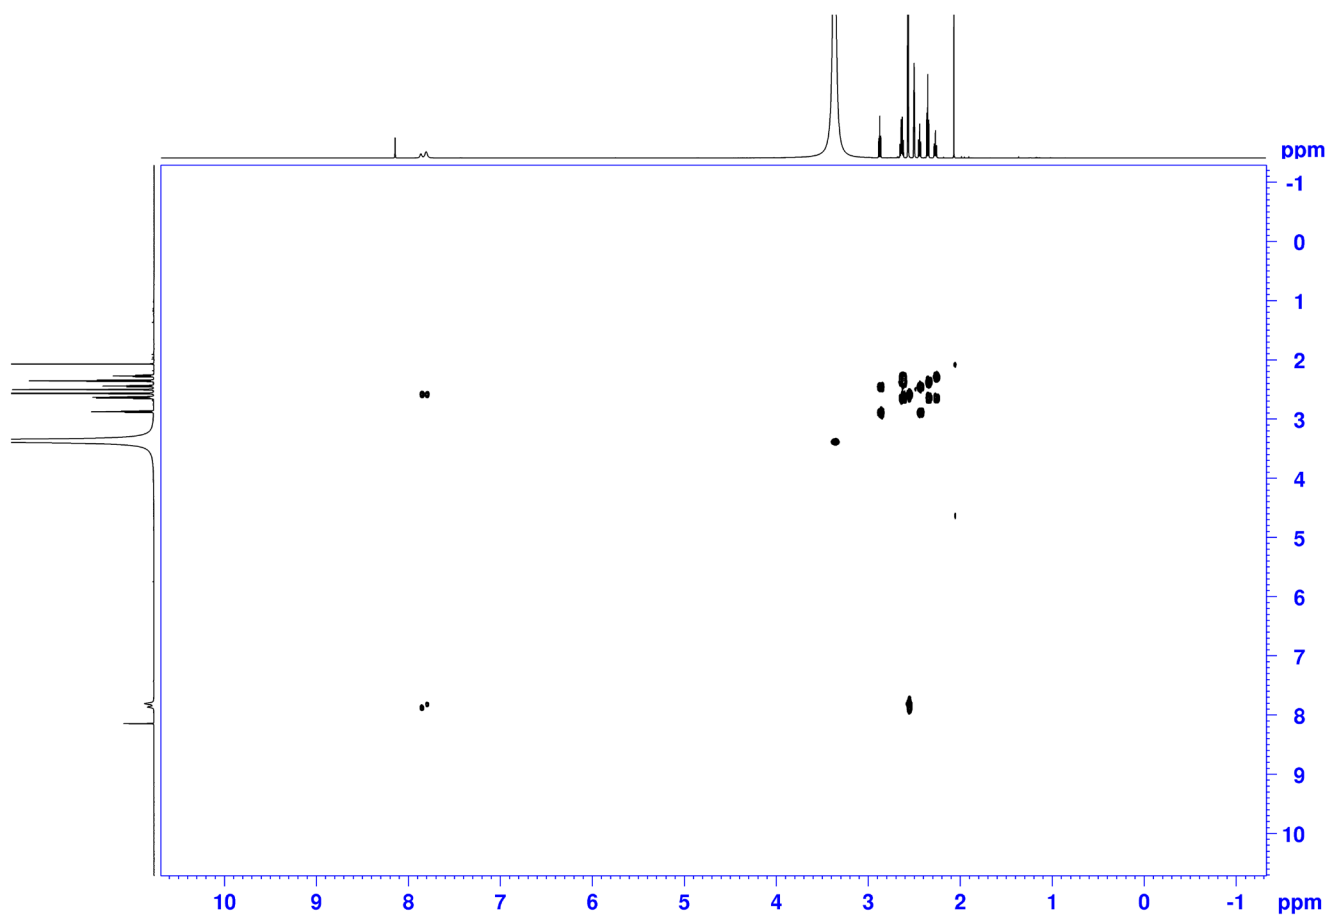

Fig. S9.  $^1\text{H}$ - $^1\text{H}$  COSY NMR (600 MHz,  $\text{DMSO-d}_6$ ) spectrum of **3a** and **3**

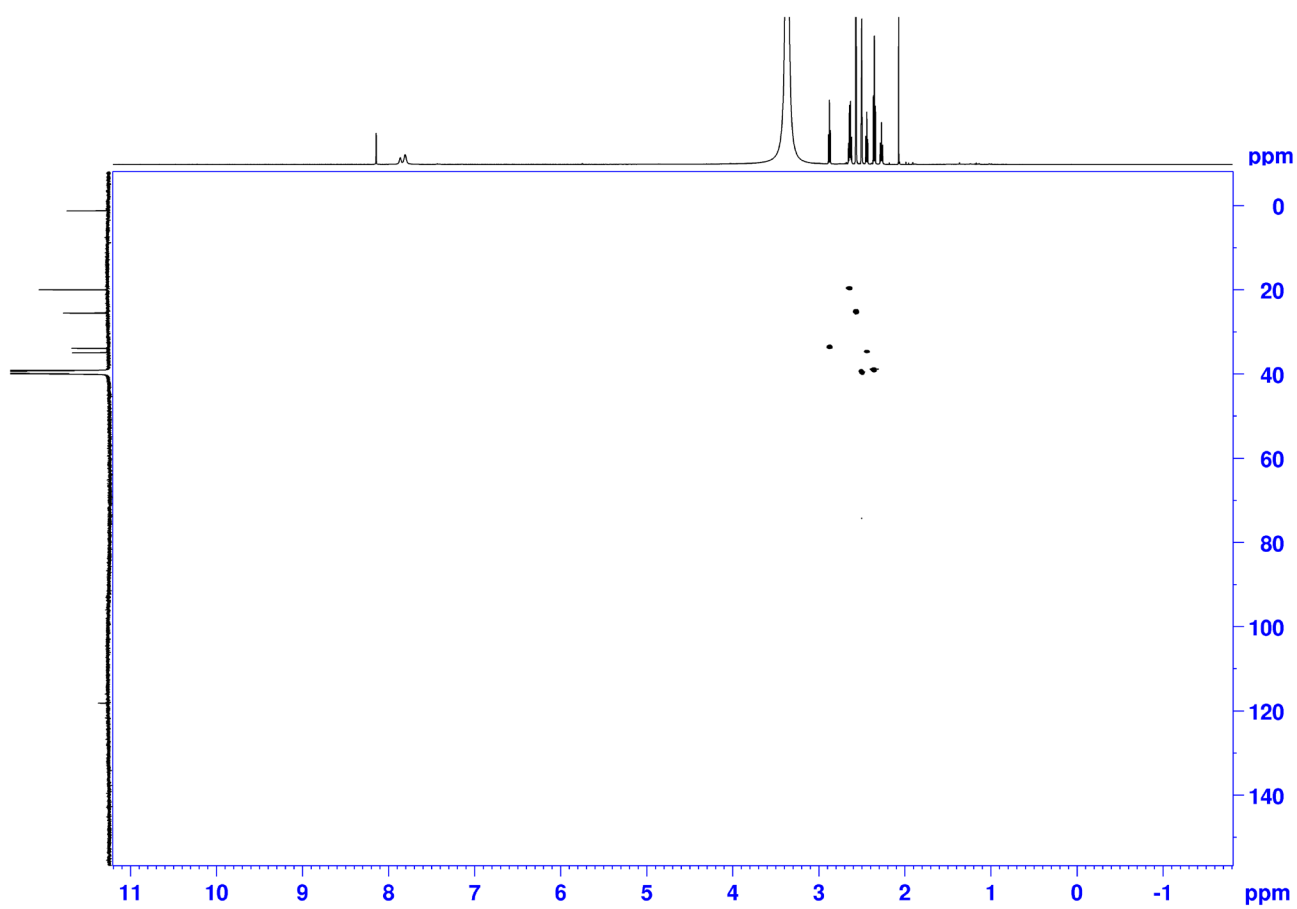

Fig. S10.  $^1\text{H}$ - $^{13}\text{C}$  HSQC NMR (600 MHz,  $\text{DMSO-d}_6$ ) spectrum of **3a** and **3**

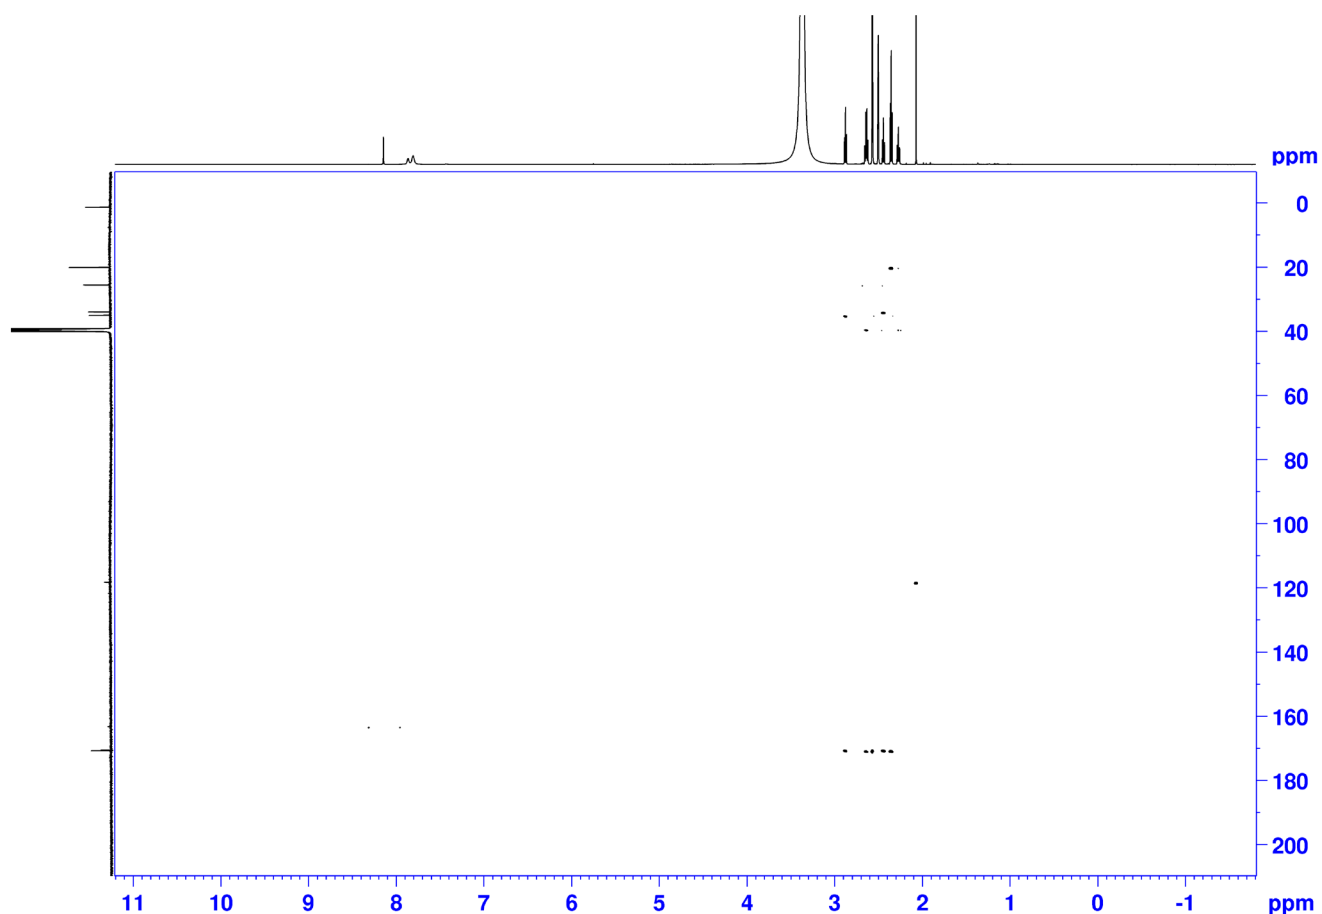

**Fig. S11.**  $^1\text{H}$ - $^{13}\text{C}$  HMBC NMR (600 MHz,  $\text{DMSO-d}_6$ ) spectrum of **3a** and **3**

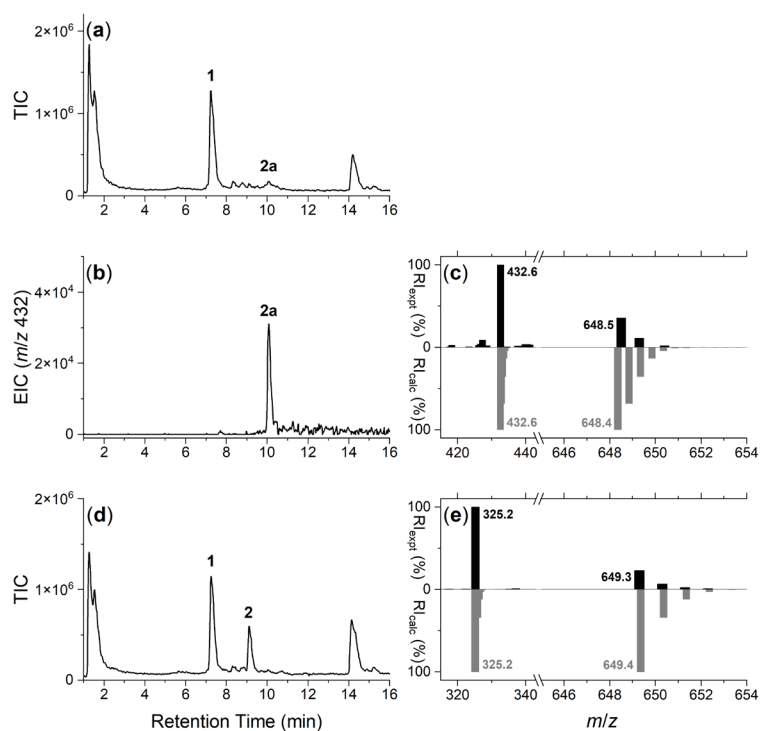

**Fig. S12.** LC-MS traces from reaction mixtures containing **2a** reported as (a) total ion current (TIC) or (b) EIC 432 corresponding with the  $[\text{M}+3\text{H}]^{3+}$  adduct, with experimental (black) MS signals from the peak at (c) 10.3 min, with calculated signals ( $[\text{M}+2\text{H}]^{2+}$ ,  $[\text{M}+3\text{H}]^{3+}$  adducts) in grey. LC-MS trace from reaction mixtures of **2a** and TCEP containing **2** reported as (d) total ion current (TIC), with experimental (black) MS signals from the peak at (e) 9.1 min, with calculated signals ( $[\text{M}+\text{H}]^+$ ,  $[\text{M}+2\text{H}]^{2+}$  adducts) in grey.



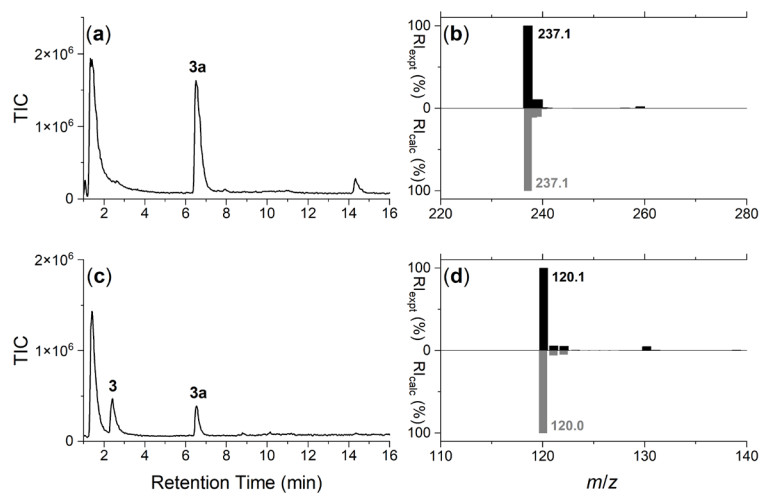

**Fig. S13.** LC-MS trace from reaction mixtures containing **3a** reported as (a) TIC, with experimental (black) MS signals from the peak at (b) 6.5 min, with calculated signals ( $[M+H]^+$  adduct) in grey. LC-MS trace from reaction mixtures of **3a** and TCEP containing **3** reported as (c) TIC, with experimental (black) MS signals from the peak at (d) 2.4 min, with calculated signals ( $[M+H]^+$  adduct) in grey.

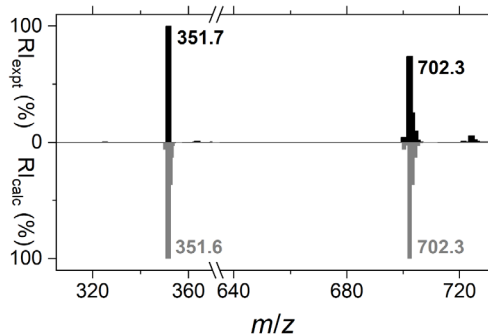

**Fig. S14.** Experimental (black) MS signals from a solution of Fe(III)-2 with calculated signals ( $[M+H]^+$ ,  $[M+2H]^{2+}$  adducts ( $M = C_{28}H_{49}FeN_6O_9S$ )) in grey.

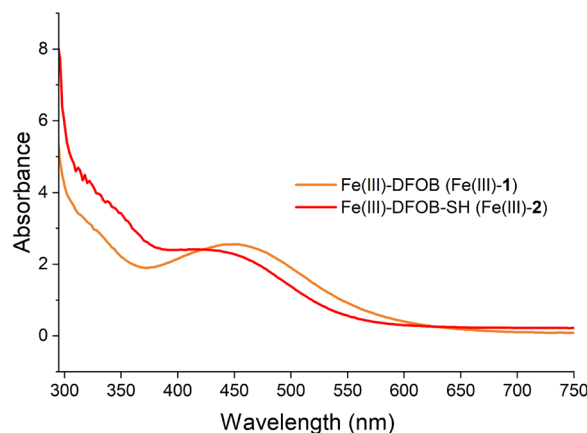

**Fig. S15.** Electronic spectra from Fe(III)-DFOB (Fe(III)-1) (orange) and Fe(III)-DFOB-SH (Fe(III)-2) (red).

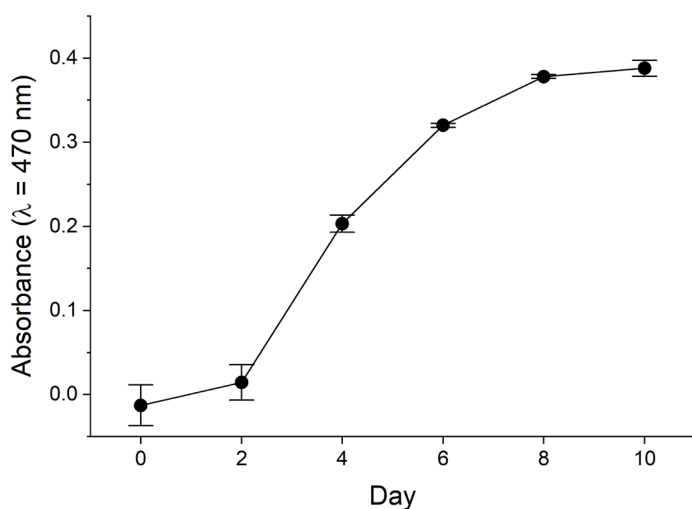

**Fig. S16.** Absorbance ( $\lambda = 470$  nm) from culture medium inoculated with *S. pilosus* sub-sampled at 2-d intervals over 0-10 d, with aliquots mixed with Fe(III) prior to analysis. Error bars represent the range for two replicate measurements.

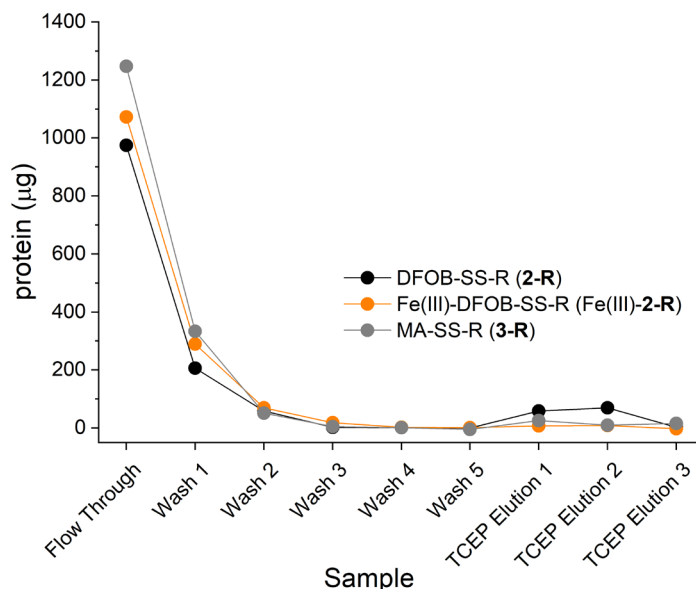

**Fig. S17.** Protein content ( $\mu\text{g}$ ) as determined using the Bradford assay in fractions collected from the pull-down procedures using **2-R** (black), Fe(III)-2-R (orange) or **R-3** (grey) resins.

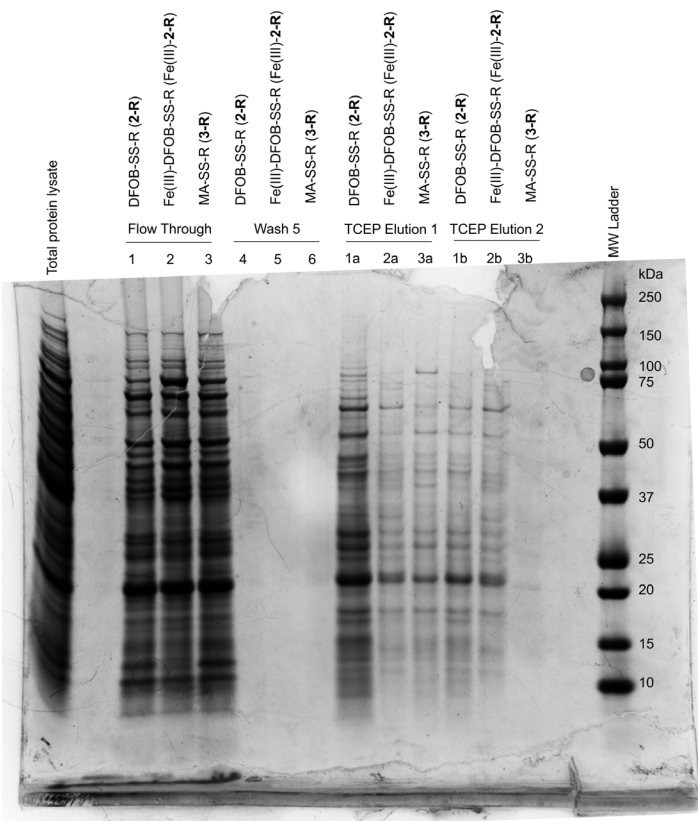

**Fig. S18.** SDS PAGE gel from fractions collected from the pull-down procedures (referenced to Fig. S2) using **2-R**, Fe(III)-**2-R** or **R-3** resins.

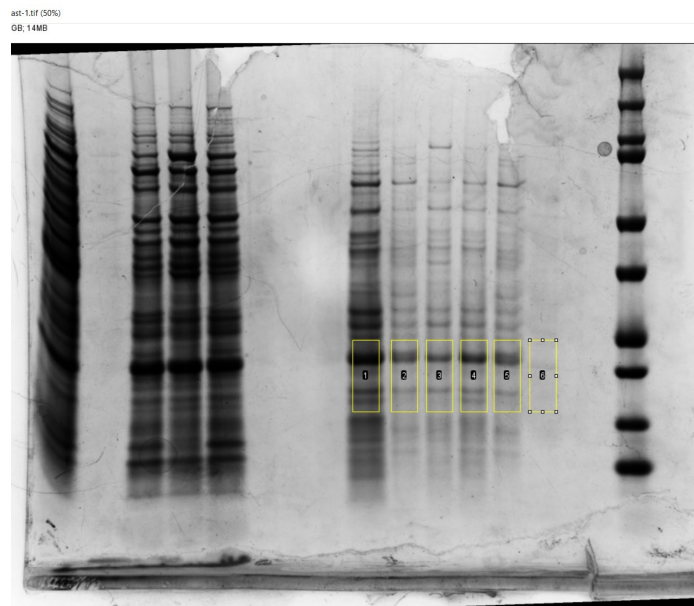

**Fig. S19.** Regions from the SDS PAGE gel (Fig. S3) sampled for densitometric analysis using ImageJ depicted in the region of interest (Fig. 4b).



**Table 1.** MS-MS peptide reads for NiSOD

|                                                                                                                                                                                                                                                                                                                                                                                                                                                                                                                                                                                                                                                                                                                                                                                                                                                                                                                                                                                                                                                                                                                                                                                                                                                                                                                                                                                     |                                                                                                                                                                                                                                                                                                                                                                                                                                                                                                                                                                                                                                                                                                                                                                                                                                                                                                                                                                                                                                                                                                                                                                                                                                                                                                                                                                                                                                                                                                                                                                                        |                                                                                                                                                                                                                                                                                                                                                                                                                                                                                                                                                                                                                                                                                                                                                                                                                                                                                                                                                                                                                                                                                                                                                                                                                                                                                                                                                                                                                                                                                                                                                                                                                                                                                                                                                                 |
|-------------------------------------------------------------------------------------------------------------------------------------------------------------------------------------------------------------------------------------------------------------------------------------------------------------------------------------------------------------------------------------------------------------------------------------------------------------------------------------------------------------------------------------------------------------------------------------------------------------------------------------------------------------------------------------------------------------------------------------------------------------------------------------------------------------------------------------------------------------------------------------------------------------------------------------------------------------------------------------------------------------------------------------------------------------------------------------------------------------------------------------------------------------------------------------------------------------------------------------------------------------------------------------------------------------------------------------------------------------------------------------|----------------------------------------------------------------------------------------------------------------------------------------------------------------------------------------------------------------------------------------------------------------------------------------------------------------------------------------------------------------------------------------------------------------------------------------------------------------------------------------------------------------------------------------------------------------------------------------------------------------------------------------------------------------------------------------------------------------------------------------------------------------------------------------------------------------------------------------------------------------------------------------------------------------------------------------------------------------------------------------------------------------------------------------------------------------------------------------------------------------------------------------------------------------------------------------------------------------------------------------------------------------------------------------------------------------------------------------------------------------------------------------------------------------------------------------------------------------------------------------------------------------------------------------------------------------------------------------|-----------------------------------------------------------------------------------------------------------------------------------------------------------------------------------------------------------------------------------------------------------------------------------------------------------------------------------------------------------------------------------------------------------------------------------------------------------------------------------------------------------------------------------------------------------------------------------------------------------------------------------------------------------------------------------------------------------------------------------------------------------------------------------------------------------------------------------------------------------------------------------------------------------------------------------------------------------------------------------------------------------------------------------------------------------------------------------------------------------------------------------------------------------------------------------------------------------------------------------------------------------------------------------------------------------------------------------------------------------------------------------------------------------------------------------------------------------------------------------------------------------------------------------------------------------------------------------------------------------------------------------------------------------------------------------------------------------------------------------------------------------------|
| <p>BEGIN IONS<br/>           TITLE=Scan 6304 (rt=18.959)<br/>           [20221020_QEHFX3_MYW_JN_Band10.raw]<br/>           PEPMASS=388.213      0.00000<br/>           CHARGE=2+<br/>           69.070 113070.78<br/>           70.066 57314.12<br/>           72.081 65215.11<br/>           84.081 61593.26<br/>           86.097 2388678.75<br/>           87.100 79797.90<br/>           102.055 82318.42<br/>           129.102 106377.80<br/>           130.086 72852.48<br/>           130.946 32746.88<br/>           147.113 125300.15<br/>           187.107 47510.57<br/>           197.128 38187.02<br/>           201.086 41416.80<br/>           215.139 769801.50<br/>           216.142 48951.51<br/>           240.098 39341.77<br/>           243.133 328998.63<br/>           246.182 98684.84<br/>           270.107 74227.59<br/>           288.117 59471.96<br/>           299.301 78435.02<br/>           333.212 113645.57<br/>           333.959 30827.55<br/>           369.176 70171.40<br/>           388.214 67722.33<br/>           389.142 59497.55<br/>           399.153 34006.35<br/>           444.242 37699.87<br/>           462.254 50675.68<br/>           533.291 769671.00<br/>           534.297 154212.44<br/>           644.324 116618.76<br/>           662.339 443302.31<br/>           663.336 123110.96<br/>           END IONS</p> | <p>BEGIN IONS<br/>           TITLE=Scan 6326 (rt=18.996)<br/>           [20221020_QEHFX3_MYW_JN_Band10.raw]<br/>           PEPMASS=388.2131      0.00000<br/>           CHARGE=2+<br/>           69.070 156509.92<br/>           70.066 51865.90<br/>           71.078 49172.88<br/>           72.081 53319.93<br/>           72.098 46445.36<br/>           74.545 48422.63<br/>           84.081 79318.81<br/>           86.097 3709283.75<br/>           87.100 110858.55<br/>           92.376 44964.17<br/>           102.055 106877.96<br/>           129.102 192783.13<br/>           147.112 234040.30<br/>           159.112 52652.85<br/>           187.144 61963.75<br/>           197.126 55133.30<br/>           201.086 54702.51<br/>           215.139 1145462.25<br/>           216.142 83943.79<br/>           243.133 597754.19<br/>           246.181 109839.15<br/>           270.110 84679.51<br/>           288.117 50523.48<br/>           299.302 97283.64<br/>           332.684 53582.06<br/>           333.214 256756.91<br/>           334.214 50190.27<br/>           369.176 139410.33<br/>           382.881 56043.52<br/>           387.181 54996.00<br/>           388.214 96311.49<br/>           399.148 85529.88<br/>           462.254 94271.88<br/>           489.953 49567.73<br/>           491.095 52050.90<br/>           533.292 1168165.88<br/>           534.299 218363.61<br/>           644.322 148288.52<br/>           662.338 735605.31<br/>           663.333 139178.88<br/>           749.418 46862.71<br/>           END IONS</p> | <p>BEGIN IONS<br/>           TITLE=Scan 6348 (rt=19.034)<br/>           [20221020_QEHFX3_MYW_JN_Band10.raw]<br/>           PEPMASS=388.2131      0.00000<br/>           CHARGE=2+<br/>           54.650 42737.64<br/>           55.668 46187.53<br/>           69.070 240103.31<br/>           72.081 79796.02<br/>           80.196 48846.57<br/>           84.081 97904.49<br/>           86.097 4501910.50<br/>           87.100 128453.38<br/>           102.055 122185.73<br/>           104.574 50934.52<br/>           129.103 192302.03<br/>           130.086 114640.52<br/>           147.113 229182.69<br/>           159.110 60556.72<br/>           187.107 52975.01<br/>           187.144 117765.17<br/>           197.128 84057.30<br/>           201.086 123006.23<br/>           215.139 1306913.63<br/>           216.142 108096.88<br/>           243.134 558306.94<br/>           244.133 76182.18<br/>           246.181 162679.44<br/>           256.075 50155.88<br/>           270.107 81372.02<br/>           288.118 100414.20<br/>           293.511 52851.66<br/>           322.719 59904.16<br/>           333.212 300078.31<br/>           369.176 141987.75<br/>           389.141 100507.22<br/>           426.126 52820.52<br/>           462.254 92808.23<br/>           488.234 55099.08<br/>           498.218 69031.96<br/>           511.641 57189.44<br/>           515.276 49948.77<br/>           533.292 1316319.00<br/>           534.295 225483.89<br/>           536.695 58106.47<br/>           563.266 114483.81<br/>           587.811 55081.45<br/>           644.328 184464.27<br/>           662.340 928857.88<br/>           663.332 169780.50<br/>           664.323 72900.63<br/>           END IONS</p> |
| <p>BEGIN IONS<br/>           TITLE=Scan 6370 (rt=19.071)<br/>           [20221020_QEHFX3_MYW_JN_Band10.raw]<br/>           PEPMASS=388.2132      0.00000<br/>           CHARGE=2+<br/>           69.070 119988.59<br/>           72.081 48557.94<br/>           84.082 38716.92<br/>           85.479 31488.63<br/>           86.097 2549247.75<br/>           87.100 65285.60</p>                                                                                                                                                                                                                                                                                                                                                                                                                                                                                                                                                                                                                                                                                                                                                                                                                                                                                                                                                                                                  | <p>BEGIN IONS<br/>           TITLE=Scan 5096 (rt=16.704)<br/>           [20221020_QEHFX3_MYW_JN_Band10.raw]<br/>           PEPMASS=488.2402      0.00000<br/>           CHARGE=2+<br/>           69.205 55626.95<br/>           70.066 155795.03<br/>           74.060 494856.75<br/>           81.095 44469.85<br/>           83.061 231848.42<br/>           84.045 295952.22</p>                                                                                                                                                                                                                                                                                                                                                                                                                                                                                                                                                                                                                                                                                                                                                                                                                                                                                                                                                                                                                                                                                                                                                                                                    | <p>BEGIN IONS<br/>           TITLE=Scan 13490 (rt=31.589)<br/>           [20221020_QEHFX3_MYW_JN_Band10.raw]<br/>           PEPMASS=575.3119      0.00000<br/>           CHARGE=2+<br/>           86.097 482423.63<br/>           108.837 14990.44<br/>           110.071 20513.44<br/>           116.071 22716.27<br/>           129.103 32027.21<br/>           130.087 19476.52</p>                                                                                                                                                                                                                                                                                                                                                                                                                                                                                                                                                                                                                                                                                                                                                                                                                                                                                                                                                                                                                                                                                                                                                                                                                                                                                                                                                                          |

|                                                                                                                                                                                                                                                                                                                                                                                                                                                                                                                                                                                                                                                                                                                                                                                                                                                                                                                                    |                                                                                                                                                                                                                                                                                                                                                                                                                                                                                                                                                                                                                                                                                                                                                                                                                                                                                                                                                                                                                                                                                                                                                                                                                                                     |                                                                                                                                                                                                                                                                                                                                                                                                                                                                                                                                                                                                                                                                                                                                                                                                                                                                                                                                                                                                                                                                                                                                                                                                                                                                                                               |
|------------------------------------------------------------------------------------------------------------------------------------------------------------------------------------------------------------------------------------------------------------------------------------------------------------------------------------------------------------------------------------------------------------------------------------------------------------------------------------------------------------------------------------------------------------------------------------------------------------------------------------------------------------------------------------------------------------------------------------------------------------------------------------------------------------------------------------------------------------------------------------------------------------------------------------|-----------------------------------------------------------------------------------------------------------------------------------------------------------------------------------------------------------------------------------------------------------------------------------------------------------------------------------------------------------------------------------------------------------------------------------------------------------------------------------------------------------------------------------------------------------------------------------------------------------------------------------------------------------------------------------------------------------------------------------------------------------------------------------------------------------------------------------------------------------------------------------------------------------------------------------------------------------------------------------------------------------------------------------------------------------------------------------------------------------------------------------------------------------------------------------------------------------------------------------------------------|---------------------------------------------------------------------------------------------------------------------------------------------------------------------------------------------------------------------------------------------------------------------------------------------------------------------------------------------------------------------------------------------------------------------------------------------------------------------------------------------------------------------------------------------------------------------------------------------------------------------------------------------------------------------------------------------------------------------------------------------------------------------------------------------------------------------------------------------------------------------------------------------------------------------------------------------------------------------------------------------------------------------------------------------------------------------------------------------------------------------------------------------------------------------------------------------------------------------------------------------------------------------------------------------------------------|
| 102.055 79467.84<br>103.923 29644.30<br>120.778 29415.96<br>129.102 168642.23<br>130.086 57170.45<br>140.275 31132.38<br>142.123 77680.18<br>147.113 141606.17<br>150.310 32385.82<br>187.145 214100.61<br>197.128 69088.34<br>201.123 54756.86<br>213.653 37296.08<br>215.139 662752.63<br>216.142 74039.91<br>234.144 49604.59<br>240.100 37444.14<br>243.133 315559.78<br>244.133 57841.93<br>270.111 38800.96<br>288.118 39588.45<br>299.315 45162.06<br>333.212 139667.16<br>349.170 53360.94<br>350.122 33442.11<br>369.176 57659.78<br>372.078 35869.17<br>387.188 36721.28<br>388.221 45279.59<br>389.143 75216.73<br>389.198 34385.41<br>399.149 41300.48<br>422.204 40337.33<br>462.254 62866.32<br>464.198 51793.43<br>533.292 682964.50<br>534.295 109524.27<br>563.271 147898.58<br>644.321 69439.06<br>649.997 35391.65<br>662.337 379010.63<br>663.335 80953.59<br>664.319 79424.07<br>780.457 35789.50<br>END IONS | 84.081 117942.76<br>84.410 67924.84<br>86.097 58807.56<br>94.051 59434.83<br>113.071 361650.16<br>115.200 54329.41<br>116.071 58894.58<br>129.102 334344.31<br>131.081 1023763.88<br>141.066 226872.34<br>143.081 82655.52<br>146.757 52209.26<br>147.113 207409.56<br>159.076 1226426.13<br>161.092 70665.17<br>166.182 49425.75<br>171.076 256683.23<br>172.638 44581.19<br>189.087 387985.47<br>196.107 92046.52<br>199.071 492432.97<br>203.103 82310.96<br>214.119 91589.47<br>217.082 515120.13<br>224.103 113773.09<br>242.113 486865.59<br>244.093 109932.40<br>268.092 120767.45<br>275.172 58596.20<br>286.102 181622.16<br>301.167 486030.75<br>301.669 128407.15<br>304.113 134325.59<br>332.193 226875.06<br>339.129 146457.28<br>357.139 155675.47<br>357.184 55468.19<br>375.150 138874.44<br>400.201 205437.77<br>433.240 314806.09<br>434.713 116652.67<br>455.226 124953.28<br>473.232 78777.87<br>479.967 57354.98<br>488.222 78428.48<br>488.293 185336.67<br>489.287 66214.88<br>504.279 194516.78<br>583.321 102685.30<br>584.310 83679.38<br>601.332 2987430.50<br>602.334 788090.31<br>603.335 64842.39<br>716.351 622187.81<br>717.358 196116.31<br>756.363 55225.31<br>817.401 390453.88<br>818.402 122038.19<br>END IONS | 136.076 74176.71<br>147.113 60373.46<br>157.134 956060.81<br>158.137 64985.84<br>183.150 19733.75<br>185.128 416623.00<br>185.163 17049.74<br>186.132 19289.64<br>200.103 71737.70<br>201.123 24584.46<br>211.144 123430.69<br>217.135 23286.35<br>223.156 28877.70<br>226.119 19754.13<br>229.118 74539.94<br>229.154 42386.48<br>230.115 25174.13<br>244.129 18170.24<br>245.114 64954.48<br>251.104 80262.58<br>251.150 130463.69<br>253.093 27920.43<br>262.139 87347.80<br>277.156 20123.41<br>279.098 67040.62<br>300.155 341355.91<br>301.161 34709.75<br>313.187 62254.55<br>314.170 22786.90<br>326.207 102716.88<br>366.178 50110.60<br>375.222 89123.82<br>392.184 78542.67<br>393.185 17719.63<br>423.652 18312.99<br>428.213 21039.98<br>435.224 62723.43<br>436.229 28224.49<br>459.256 17498.90<br>461.291 35768.66<br>463.222 97766.21<br>464.221 16815.87<br>476.252 18641.80<br>485.273 24689.29<br>486.251 31290.37<br>503.284 45922.27<br>574.321 295147.53<br>575.323 117215.99<br>576.338 67539.71<br>591.282 30270.17<br>661.336 20482.18<br>687.408 195385.28<br>688.403 55180.77<br>704.359 24620.62<br>850.466 148212.42<br>851.468 52859.67<br>852.455 18037.45<br>947.514 17652.53<br>965.494 369017.13<br>966.494 150878.80<br>967.515 32226.92<br>1019.502 19753.15<br>END IONS |
| BEGIN IONS<br>TITLE=Scan 13512 (rt=31.626)<br>[20221020_QEHFX3_<br>MYW_JN_Band10.raw]<br>PEPMASS=575.313 0.00000                                                                                                                                                                                                                                                                                                                                                                                                                                                                                                                                                                                                                                                                                                                                                                                                                   | BEGIN IONS<br>TITLE=Scan 13534 (rt=31.663)<br>[20221020_QEHFX3_<br>MYW_JN_Band10.raw]<br>PEPMASS=575.3138 0.00000                                                                                                                                                                                                                                                                                                                                                                                                                                                                                                                                                                                                                                                                                                                                                                                                                                                                                                                                                                                                                                                                                                                                   | BEGIN IONS<br>TITLE=Scan 6304 (rt=18.959)<br>[20221020_QEHFX3_<br>MYW_JN_Band10.raw]<br>PEPMASS=388.213 0.00000                                                                                                                                                                                                                                                                                                                                                                                                                                                                                                                                                                                                                                                                                                                                                                                                                                                                                                                                                                                                                                                                                                                                                                                               |

|                                                                                                                                                                                                                                                                                                                                                                                                                                                                                                                                                                                                                                                                                                                                                                                                                                                                                                      |                                                                                                                                                                                                                                                                                                                                                                                                                                                                                                                                                                                                                                                                                                                                                                                                                                                                                                                                                                                                                                                                                                                                                                                                   |                                                                                                                                                                                                                                                                                                                                                                                                                                                                                                                                                                                                                                                                                                                                                                                                        |
|------------------------------------------------------------------------------------------------------------------------------------------------------------------------------------------------------------------------------------------------------------------------------------------------------------------------------------------------------------------------------------------------------------------------------------------------------------------------------------------------------------------------------------------------------------------------------------------------------------------------------------------------------------------------------------------------------------------------------------------------------------------------------------------------------------------------------------------------------------------------------------------------------|---------------------------------------------------------------------------------------------------------------------------------------------------------------------------------------------------------------------------------------------------------------------------------------------------------------------------------------------------------------------------------------------------------------------------------------------------------------------------------------------------------------------------------------------------------------------------------------------------------------------------------------------------------------------------------------------------------------------------------------------------------------------------------------------------------------------------------------------------------------------------------------------------------------------------------------------------------------------------------------------------------------------------------------------------------------------------------------------------------------------------------------------------------------------------------------------------|--------------------------------------------------------------------------------------------------------------------------------------------------------------------------------------------------------------------------------------------------------------------------------------------------------------------------------------------------------------------------------------------------------------------------------------------------------------------------------------------------------------------------------------------------------------------------------------------------------------------------------------------------------------------------------------------------------------------------------------------------------------------------------------------------------|
| <p>CHARGE=2+</p> <p>86.097 1574392.38<br/>136.076 259357.52<br/>147.113 155526.20<br/>148.418 85656.13<br/>154.591 84540.76<br/>157.134 3823729.75<br/>158.137 207641.73<br/>174.015 105551.65<br/>185.128 1567201.50<br/>200.104 187187.55<br/>201.123 98581.87<br/>229.120 254594.88<br/>251.103 352490.88<br/>251.150 141689.70<br/>262.139 397590.56<br/>277.156 128544.46<br/>279.098 217965.52<br/>300.155 1192844.00<br/>313.186 242382.08<br/>326.207 107739.77<br/>355.155 109858.63<br/>375.222 338526.72<br/>392.183 405804.19<br/>435.224 243721.17<br/>436.228 101981.97<br/>439.295 84113.84<br/>463.216 375979.94<br/>503.284 228402.58<br/>574.322 976819.94<br/>575.326 241031.27<br/>591.271 113893.70<br/>687.407 855702.25<br/>688.414 195800.13<br/>850.469 644313.56<br/>851.469 326451.25<br/>965.497 1660251.75<br/>966.504 598337.81<br/>967.489 110984.27<br/>END IONS</p> | <p>CHARGE=2+</p> <p>86.092 24758.09<br/>86.097 245890.31<br/>102.104 15502.34<br/>110.071 31890.05<br/>116.071 21157.42<br/>127.328 14880.92<br/>129.103 30643.64<br/>136.076 31206.09<br/>147.112 22010.22<br/>157.134 542455.63<br/>158.138 19494.77<br/>173.104 15223.32<br/>183.150 23561.44<br/>185.128 222132.16<br/>186.132 18518.58<br/>186.414 15192.61<br/>200.104 32618.14<br/>201.123 21262.67<br/>211.144 131296.84<br/>223.155 30142.80<br/>229.117 42455.99<br/>229.154 23264.51<br/>244.129 30860.14<br/>249.160 22838.42<br/>251.103 40520.20<br/>251.150 135764.64<br/>262.141 31073.69<br/>277.162 20185.61<br/>279.098 25434.79<br/>300.155 194927.13<br/>313.187 20554.14<br/>323.328 22528.71<br/>326.206 136637.45<br/>366.177 39708.02<br/>375.225 46216.45<br/>392.178 51572.66<br/>428.211 27114.58<br/>435.223 45936.55<br/>454.257 16793.72<br/>461.284 47636.88<br/>463.215 47399.34<br/>503.282 45833.10<br/>559.869 16685.82<br/>574.323 168947.48<br/>575.319 72814.45<br/>576.338 71960.01<br/>687.400 108394.25<br/>688.397 23619.89<br/>704.359 23717.87<br/>850.468 97221.82<br/>851.472 31604.88<br/>965.494 238569.78<br/>966.513 80997.95<br/>END IONS</p> | <p>CHARGE=2+</p> <p>69.070 113070.78<br/>70.066 57314.12<br/>72.081 65215.11<br/>84.081 61593.26<br/>86.097 2388678.75<br/>87.100 79797.90<br/>102.055 82318.42<br/>129.102 106377.80<br/>130.086 72852.48<br/>130.946 32746.88<br/>147.113 125300.15<br/>187.107 47510.57<br/>197.128 38187.02<br/>201.086 41416.80<br/>215.139 769801.50<br/>216.142 48951.51<br/>240.098 39341.77<br/>243.133 328998.63<br/>246.182 98684.84<br/>270.107 74227.59<br/>288.117 59471.96<br/>299.301 78435.02<br/>333.212 113645.57<br/>333.959 30827.55<br/>369.176 70171.40<br/>388.214 67722.33<br/>389.142 59497.55<br/>399.153 34006.35<br/>444.242 37699.87<br/>462.254 50675.68<br/>533.291 769671.00<br/>534.297 154212.44<br/>644.324 116618.76<br/>662.339 443302.31<br/>663.336 123110.96<br/>END IONS</p> |
| <p>BEGIN IONS</p> <p>TITLE=Scan 6326 (rt=18.996)<br/>[20221020_QEHFX3_<br/>MYW_JN_Band10.raw]<br/>PEPMASS=388.2131 0.00000<br/>CHARGE=2+</p> <p>69.070 156509.92<br/>70.066 51865.90<br/>71.078 49172.88<br/>72.081 53319.93<br/>72.098 46445.36<br/>74.545 48422.63</p>                                                                                                                                                                                                                                                                                                                                                                                                                                                                                                                                                                                                                             | <p>BEGIN IONS</p> <p>TITLE=Scan 6348 (rt=19.034)<br/>[20221020_QEHFX3_<br/>MYW_JN_Band10.raw]<br/>PEPMASS=388.2131 0.00000<br/>CHARGE=2+</p> <p>54.650 42737.64<br/>55.668 46187.53<br/>69.070 240103.31<br/>72.081 79796.02<br/>80.196 48846.57<br/>84.081 97904.49</p>                                                                                                                                                                                                                                                                                                                                                                                                                                                                                                                                                                                                                                                                                                                                                                                                                                                                                                                          | <p>BEGIN IONS</p> <p>TITLE=Scan 6370 (rt=19.071)<br/>[20221020_QEHFX3_<br/>MYW_JN_Band10.raw]<br/>PEPMASS=388.2132 0.00000<br/>CHARGE=2+</p> <p>69.070 119988.59<br/>72.081 48557.94<br/>84.082 38716.92<br/>85.479 31488.63<br/>86.097 2549247.75<br/>87.100 65285.60</p>                                                                                                                                                                                                                                                                                                                                                                                                                                                                                                                             |

|                                                                                                                                                                                                                                                                                                                                                                                                                                                                                                                                                                                                                                                                                                                                                    |                                                                                                                                                                                                                                                                                                                                                                                                                                                                                                                                                                                                                                                                                                                                                                                                                                                                 |                                                                                                                                                                                                                                                                                                                                                                                                                                                                                                                                                                                                                                                                                                                                                                                                                                                                                                                                    |
|----------------------------------------------------------------------------------------------------------------------------------------------------------------------------------------------------------------------------------------------------------------------------------------------------------------------------------------------------------------------------------------------------------------------------------------------------------------------------------------------------------------------------------------------------------------------------------------------------------------------------------------------------------------------------------------------------------------------------------------------------|-----------------------------------------------------------------------------------------------------------------------------------------------------------------------------------------------------------------------------------------------------------------------------------------------------------------------------------------------------------------------------------------------------------------------------------------------------------------------------------------------------------------------------------------------------------------------------------------------------------------------------------------------------------------------------------------------------------------------------------------------------------------------------------------------------------------------------------------------------------------|------------------------------------------------------------------------------------------------------------------------------------------------------------------------------------------------------------------------------------------------------------------------------------------------------------------------------------------------------------------------------------------------------------------------------------------------------------------------------------------------------------------------------------------------------------------------------------------------------------------------------------------------------------------------------------------------------------------------------------------------------------------------------------------------------------------------------------------------------------------------------------------------------------------------------------|
| 84.081 79318.81<br>86.097 3709283.75<br>87.100 110858.55<br>92.376 44964.17<br>102.055 106877.96<br>129.102 192783.13<br>147.112 234040.30<br>159.112 52652.85<br>187.144 61963.75<br>197.126 55133.30<br>201.086 54702.51<br>215.139 1145462.25<br>216.142 83943.79<br>243.133 597754.19<br>246.181 109839.15<br>270.110 84679.51<br>288.117 50523.48<br>299.302 97283.64<br>332.684 53582.06<br>333.214 256756.91<br>334.214 50190.27<br>369.176 139410.33<br>382.881 56043.52<br>387.181 54996.00<br>388.214 96311.49<br>399.148 85529.88<br>462.254 94271.88<br>489.953 49567.73<br>491.095 52050.90<br>533.292 1168165.88<br>534.299 218363.61<br>644.322 148288.52<br>662.338 735605.31<br>663.333 139178.88<br>749.418 46862.71<br>END IONS | 86.097 4501910.50<br>87.100 128453.38<br>102.055 122185.73<br>104.574 50934.52<br>129.103 192302.03<br>130.086 114640.52<br>147.113 229182.69<br>159.110 60556.72<br>187.107 52975.01<br>187.144 117765.17<br>197.128 84057.30<br>201.086 123006.23<br>215.139 1306913.63<br>216.142 108096.88<br>243.134 558306.94<br>244.133 76182.18<br>246.181 162679.44<br>256.075 50155.88<br>270.107 81372.02<br>288.118 100414.20<br>293.511 52851.66<br>322.719 59904.16<br>333.212 300078.31<br>369.176 141987.75<br>389.141 100507.22<br>426.126 52820.52<br>462.254 92808.23<br>488.234 55099.08<br>498.218 69031.96<br>511.641 57189.44<br>515.276 49948.77<br>533.292 1316319.00<br>534.295 225483.89<br>536.695 58106.47<br>563.266 114483.81<br>587.811 55081.45<br>644.328 184464.27<br>662.340 928857.88<br>663.332 169780.50<br>664.323 72900.63<br>END IONS | 102.055 79467.84<br>103.923 29644.30<br>120.778 29415.96<br>129.102 168642.23<br>130.086 57170.45<br>140.275 31132.38<br>142.123 77680.18<br>147.113 141606.17<br>150.310 32385.82<br>187.145 214100.61<br>197.128 69088.34<br>201.123 54756.86<br>213.653 37296.08<br>215.139 662752.63<br>216.142 74039.91<br>234.144 49604.59<br>240.100 37444.14<br>243.133 315559.78<br>244.133 57841.93<br>270.111 38800.96<br>288.118 39588.45<br>299.315 45162.06<br>333.212 139667.16<br>349.170 53360.94<br>350.122 33442.11<br>369.176 57659.78<br>372.078 35869.17<br>387.188 36721.28<br>388.221 45279.59<br>389.143 75216.73<br>389.198 34385.41<br>399.149 41300.48<br>422.204 40337.33<br>462.254 62866.32<br>464.198 51793.43<br>533.292 682964.50<br>534.295 109524.27<br>563.271 147898.58<br>644.321 69439.06<br>649.997 35391.65<br>662.337 379010.63<br>663.335 80953.59<br>664.319 79424.07<br>780.457 35789.50<br>END IONS |
| BEGIN IONS<br>TITLE=Scan 13490 (rt=31.589)<br>[20221020_QEAFX3_<br>MYW_JN_Band10.raw]<br>PEPMASS=575.3119 0.00000<br>CHARGE=2+<br>86.097 482423.63<br>108.837 14990.44<br>110.071 20513.44<br>116.071 22716.27<br>129.103 32027.21<br>130.087 19476.52<br>136.076 74176.71<br>147.113 60373.46<br>157.134 956060.81<br>158.137 64985.84<br>183.150 19733.75<br>185.128 416623.00<br>185.163 17049.74<br>186.132 19289.64<br>200.103 71737.70<br>201.123 24584.46                                                                                                                                                                                                                                                                                   | BEGIN IONS<br>TITLE=Scan 13512 (rt=31.626)<br>[20221020_QEAFX3_<br>MYW_JN_Band10.raw]<br>PEPMASS=575.313 0.00000<br>CHARGE=2+<br>86.097 1574392.38<br>136.076 259357.52<br>147.113 155526.20<br>148.418 85656.13<br>154.591 84540.76<br>157.134 3823729.75<br>158.137 207641.73<br>174.015 105551.65<br>185.128 1567201.50<br>200.104 187187.55<br>201.123 98581.87<br>229.120 254594.88<br>251.103 352490.88<br>251.150 141689.70<br>262.139 397590.56<br>277.156 128544.46                                                                                                                                                                                                                                                                                                                                                                                    | BEGIN IONS<br>TITLE=Scan 13534 (rt=31.663)<br>[20221020_QEAFX3_<br>MYW_JN_Band10.raw]<br>PEPMASS=575.3138 0.00000<br>CHARGE=2+<br>86.092 24758.09<br>86.097 245890.31<br>102.104 15502.34<br>110.071 31890.05<br>116.071 21157.42<br>127.328 14880.92<br>129.103 30643.64<br>136.076 31206.09<br>147.112 22010.22<br>157.134 542455.63<br>158.138 19494.77<br>173.104 15223.32<br>183.150 23561.44<br>185.128 222132.16<br>186.132 18518.58<br>186.414 15192.61                                                                                                                                                                                                                                                                                                                                                                                                                                                                    |

|                   |                    |                   |
|-------------------|--------------------|-------------------|
| 211.144 123430.69 | 279.098 217965.52  | 200.104 32618.14  |
| 217.135 23286.35  | 300.155 1192844.00 | 201.123 21262.67  |
| 223.156 28877.70  | 313.186 242382.08  | 211.144 131296.84 |
| 226.119 19754.13  | 326.207 107739.77  | 223.155 30142.80  |
| 229.118 74539.94  | 355.155 109858.63  | 229.117 42455.99  |
| 229.154 42386.48  | 375.222 338526.72  | 229.154 23264.51  |
| 230.115 25174.13  | 392.183 405804.19  | 244.129 30860.14  |
| 244.129 18170.24  | 435.224 243721.17  | 249.160 22838.42  |
| 245.114 64954.48  | 436.228 101981.97  | 251.103 40520.20  |
| 251.104 80262.58  | 439.295 84113.84   | 251.150 135764.64 |
| 251.150 130463.69 | 463.216 375979.94  | 262.141 31073.69  |
| 253.093 27920.43  | 503.284 228402.58  | 277.162 20185.61  |
| 262.139 87347.80  | 574.322 976819.94  | 279.098 25434.79  |
| 277.156 20123.41  | 575.326 241031.27  | 300.155 194927.13 |
| 279.098 67040.62  | 591.271 113893.70  | 313.187 20554.14  |
| 300.155 341355.91 | 687.407 855702.25  | 323.328 22528.71  |
| 301.161 34709.75  | 688.414 195800.13  | 326.206 136637.45 |
| 313.187 62254.55  | 850.469 644313.56  | 366.177 39708.02  |
| 314.170 22786.90  | 851.469 326451.25  | 375.225 46216.45  |
| 326.207 102716.88 | 965.497 1660251.75 | 392.178 51572.66  |
| 366.178 50110.60  | 966.504 598337.81  | 428.211 27114.58  |
| 375.222 89123.82  | 967.489 110984.27  | 435.223 45936.55  |
| 392.184 78542.67  | END IONS           | 454.257 16793.72  |
| 393.185 17719.63  |                    | 461.284 47636.88  |
| 423.652 18312.99  |                    | 463.215 47399.34  |
| 428.213 21039.98  |                    | 503.282 45833.10  |
| 435.224 62723.43  |                    | 559.869 16685.82  |
| 436.229 28224.49  |                    | 574.323 168947.48 |
| 459.256 17498.90  |                    | 575.319 72814.45  |
| 461.291 35768.66  |                    | 576.338 71960.01  |
| 463.222 97766.21  |                    | 687.400 108394.25 |
| 464.221 16815.87  |                    | 688.397 23619.89  |
| 476.252 18641.80  |                    | 704.359 23717.87  |
| 485.273 24689.29  |                    | 850.468 97221.82  |
| 486.251 31290.37  |                    | 851.472 31604.88  |
| 503.284 45922.27  |                    | 965.494 238569.78 |
| 574.321 295147.53 |                    | 966.513 80997.95  |
| 575.323 117215.99 |                    | END IONS          |
| 576.338 67539.71  |                    |                   |
| 591.282 30270.17  |                    |                   |
| 661.336 20482.18  |                    |                   |
| 687.408 195385.28 |                    |                   |
| 688.403 55180.77  |                    |                   |
| 704.359 24620.62  |                    |                   |
| 850.466 148212.42 |                    |                   |
| 851.468 52859.67  |                    |                   |
| 852.455 18037.45  |                    |                   |
| 947.514 17652.53  |                    |                   |
| 965.494 369017.13 |                    |                   |
| 966.494 150878.80 |                    |                   |
| 967.515 32226.92  |                    |                   |
| 1019.502 19753.15 |                    |                   |
| END IONS          |                    |                   |
